# Supplementary material for: Seguridad alimentaria y medioambiental en el uso de fitosanitarios
Source: Royal Society of Chemistry journal article supplement (doi:10.1039/c9na00236g), 2008-01-01
Supplement: c9na00236g1.pdf [file c9na00236g1.pdf]

## Quantification and biodegradability assessment of meso-2,3-dimercaptosuccinic acid adsorbed on iron oxide nanoparticles

S. Bemowsky,<sup>a</sup> A. Rother,<sup>a</sup> W. Willmann,<sup>b,c</sup> J. Köser,<sup>a</sup> M. Markiewicz,<sup>a,d</sup> R. Dringen<sup>b,c</sup> and S. Stolte<sup>\*a,d</sup>

### Electronic Supplementary Information (ESI)

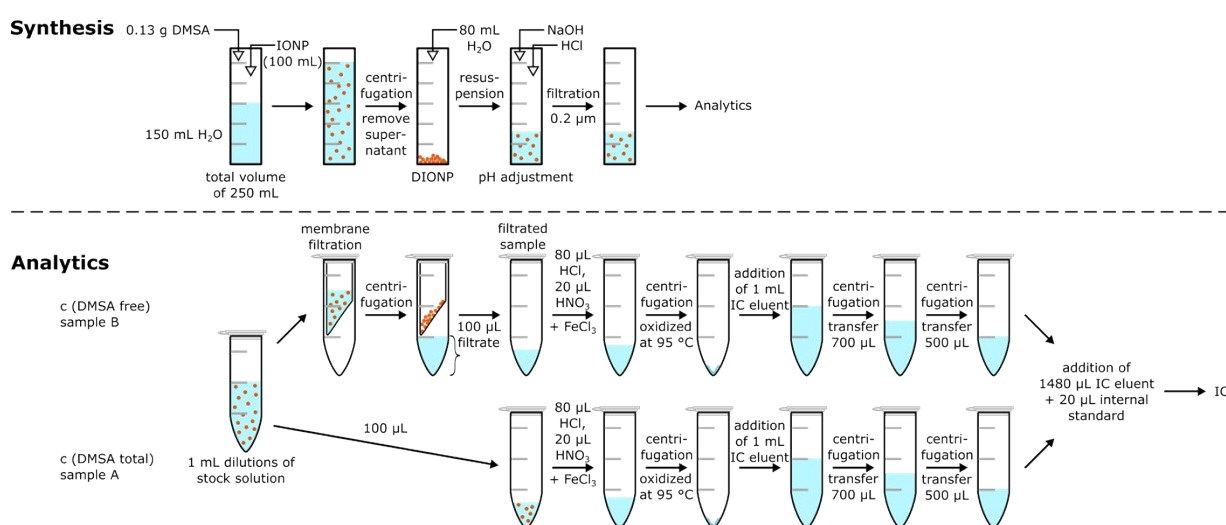

Fig. S1: Flowchart for sample preparation to determine bound DMSA concentrations.

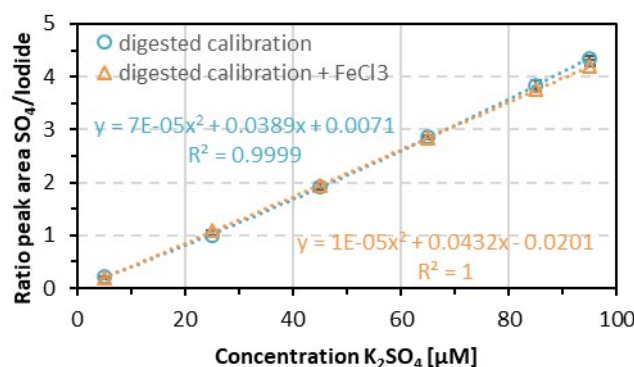

Fig. S2: Calibration and determination of recovery rates after the digestion process of  $K_2SO_4$  over the concentration range from 5 to 95  $\mu M$  with added  $FeCl_3$  (0.125 mM). Data represent mean values  $\pm$  SD ( $n = 3$ ).

<sup>a</sup> UFT – Centre for Environmental Research and Sustainable Technology, Department Sustainable Chemistry, University of Bremen, Leobener Straße 6, D-28359 Bremen, Germany.

<sup>b</sup> CBIB – Centre for Biomolecular Interactions Bremen, Neurobiochemistry, Faculty 2 (Biology/Chemistry) University of Bremen, Leobener Straße 5 / NW2, D-28359 Bremen, Germany.

<sup>c</sup> UFT - Centre for Environmental Research and Sustainable Technology, Department Neurobiochemistry, University of Bremen, Leobener Straße 6, D-28359 Bremen, Germany.

<sup>d</sup> Technische Universität Dresden, Faculty of Environmental Sciences, Department of Hydrosociences, Institute of Water Chemistry, Bergstraße 66, 01069 Dresden, Germany.  
 \*E-mail: stefan.stolte@tu-dresden.de

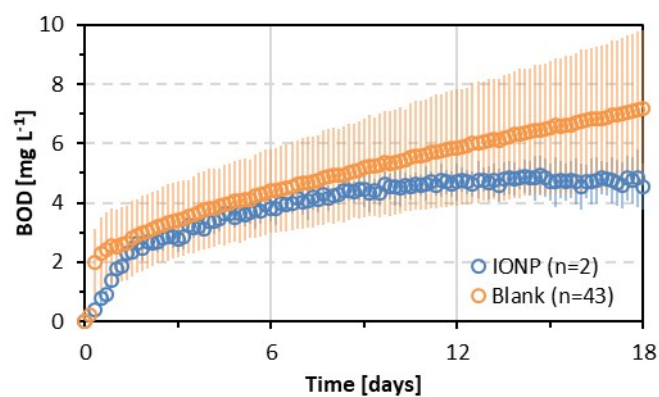

**Fig. S3:** Biochemical oxygen demand (BOD) of the sample controls (blank and uncoated iron oxide nanoparticles, IONP) for the biodegradation test system. Data represent mean values  $\pm$  SD (error range as an area of coloured lines,  $n = 2$  for IONP and  $n = 43$  for blank).

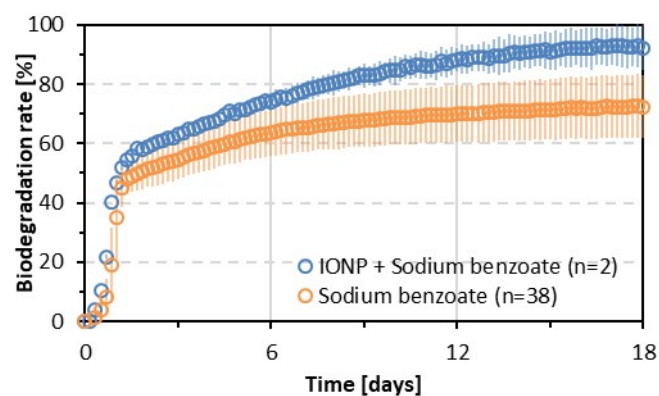

**Fig. S4:** Biological degradation of positive control sodium benzoate with and without the presence of IONP. Data represent mean values  $\pm$  SD (error range as an area of coloured lines,  $n = 2$  for IONP and  $n = 38$  for sodium benzoate control).
